# Supplementary material for: Effect of the Chemical Composition of Mesoporous Cerium-Zirconium Oxides on the Modification with Sulfur and Gold Species and Their Application in Glycerol Oxidation
Source: Preprints.org preprint supplement (doi:10.20944/preprints201711.0106.v1), 2017-11-16
Supplement: Supplementary file 1 [file supplementary]

*Supplementary Materials*

# **Effect of the Chemical Composition of Mesoporous Cerium-Zirconium Oxides on the Modification with Sulfur and Gold Species and Their Application in Glycerol Oxidation**

**Piotr Kaminski**<sup>1, 2,\*</sup>

<sup>1</sup> Adam Mickiewicz University in Poznań, Faculty of Chemistry, ul. Umultowska 89b, 61-614 Poznań, Poland; e-mail: piotr.kaminski@amu.edu.pl

<sup>2</sup> Wrocław Research Centre EIT+, the Polymer Materials Laboratory, ul. Stabłowicka 147, 54-066 Wrocław, Poland; e-mail: piotr.kaminski@eitplus.pl

\* Correspondence: piotrkaminski2905@gmail.com; Tel.: +48-71-734-7112

---

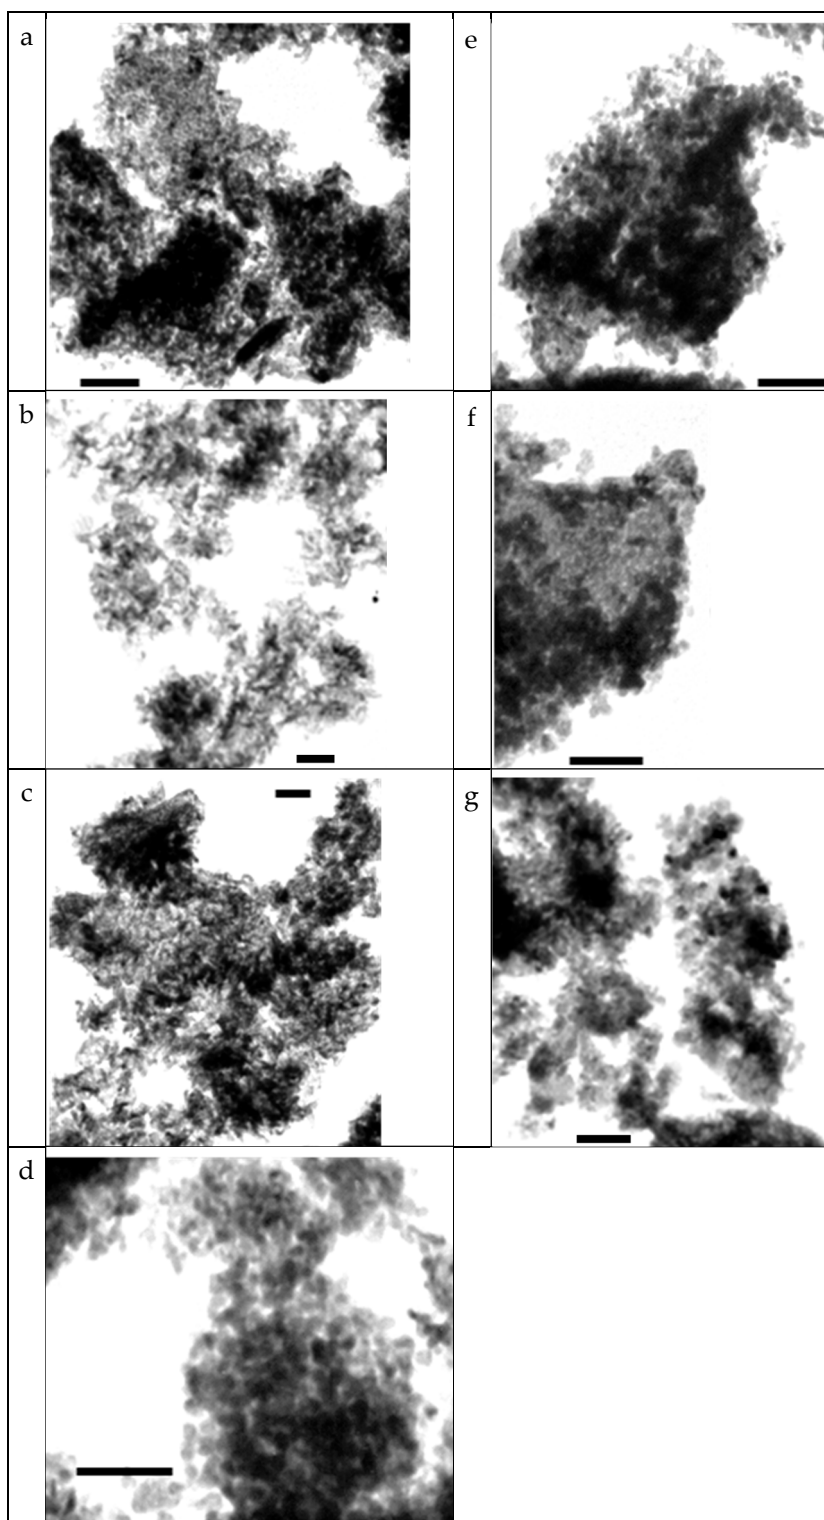

**Fig. S1.** TEM images recorded for catalysts with sulphur species after modification with gold: a)  $\text{Au/CeO}_2\text{S}_{(2-x)}$ , b)  $\text{Au/CeZrO}_x\text{S}_{(2-x)}(4:1)$ , c)  $\text{Au/CeZrO}_x\text{S}_{(2-x)}(2:1)$ , d)  $\text{Au/CeZrO}_x\text{S}_{(2-x)}(1:1)$ , e)  $\text{Au/CeZrO}_x\text{S}_{(2-x)}(1:2)$ , f)  $\text{Au/CeZrO}_x\text{S}_{(2-x)}(1:4)$ , g)  $\text{Au/ZrO}_2\text{S}_{(2-x)}$ . The lines in the images correspond to 50 nm.

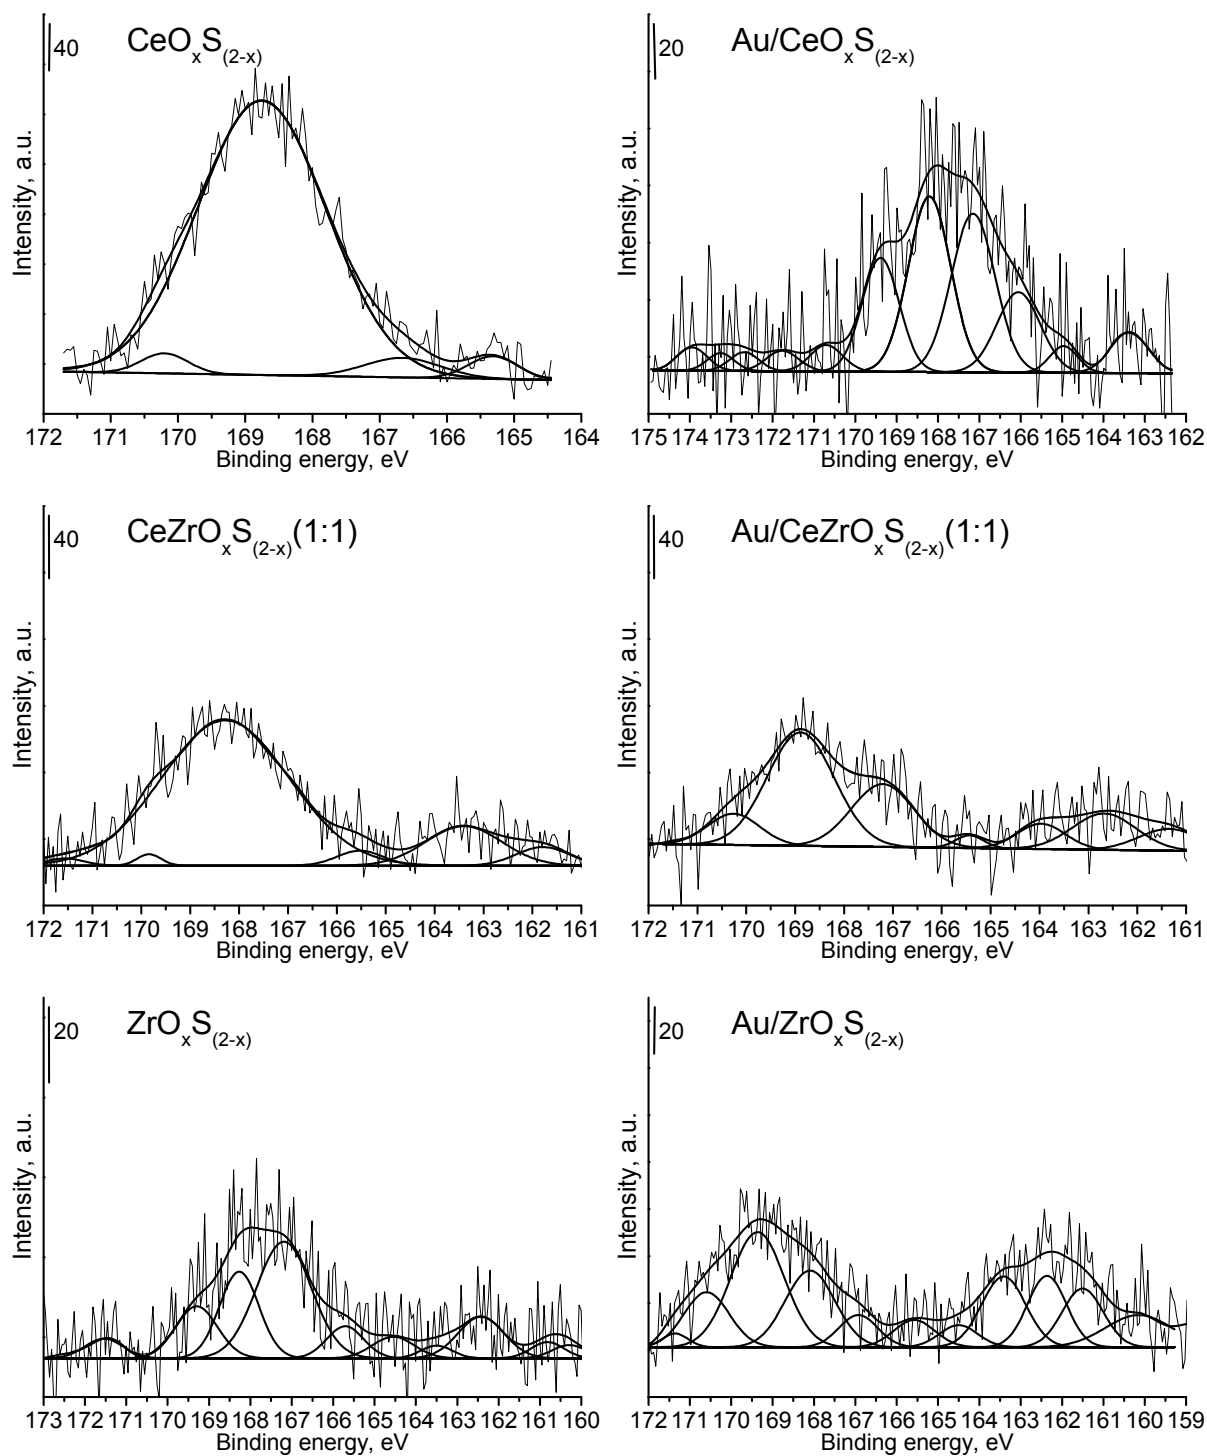

**Fig. S2.** XPS spectra recorded for S 2p species for samples before and after modification with Au.

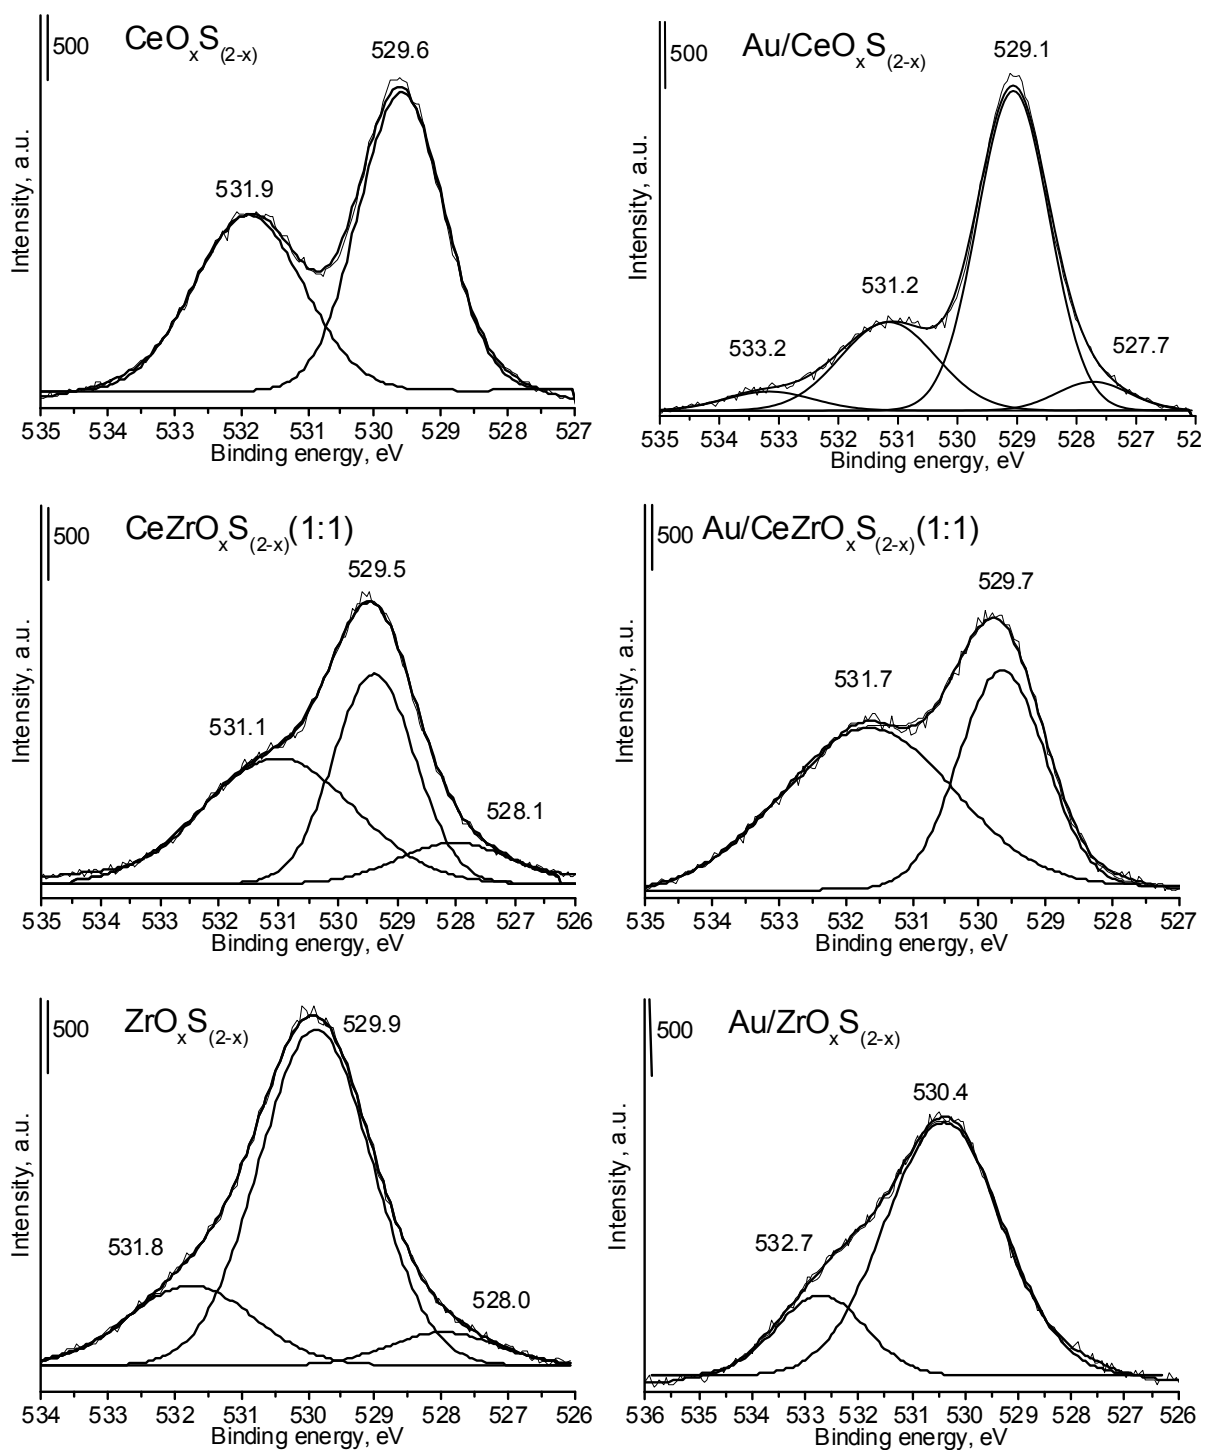

Fig. S3. XP spectra recorded for O 1s species for samples before and after modification with Au.

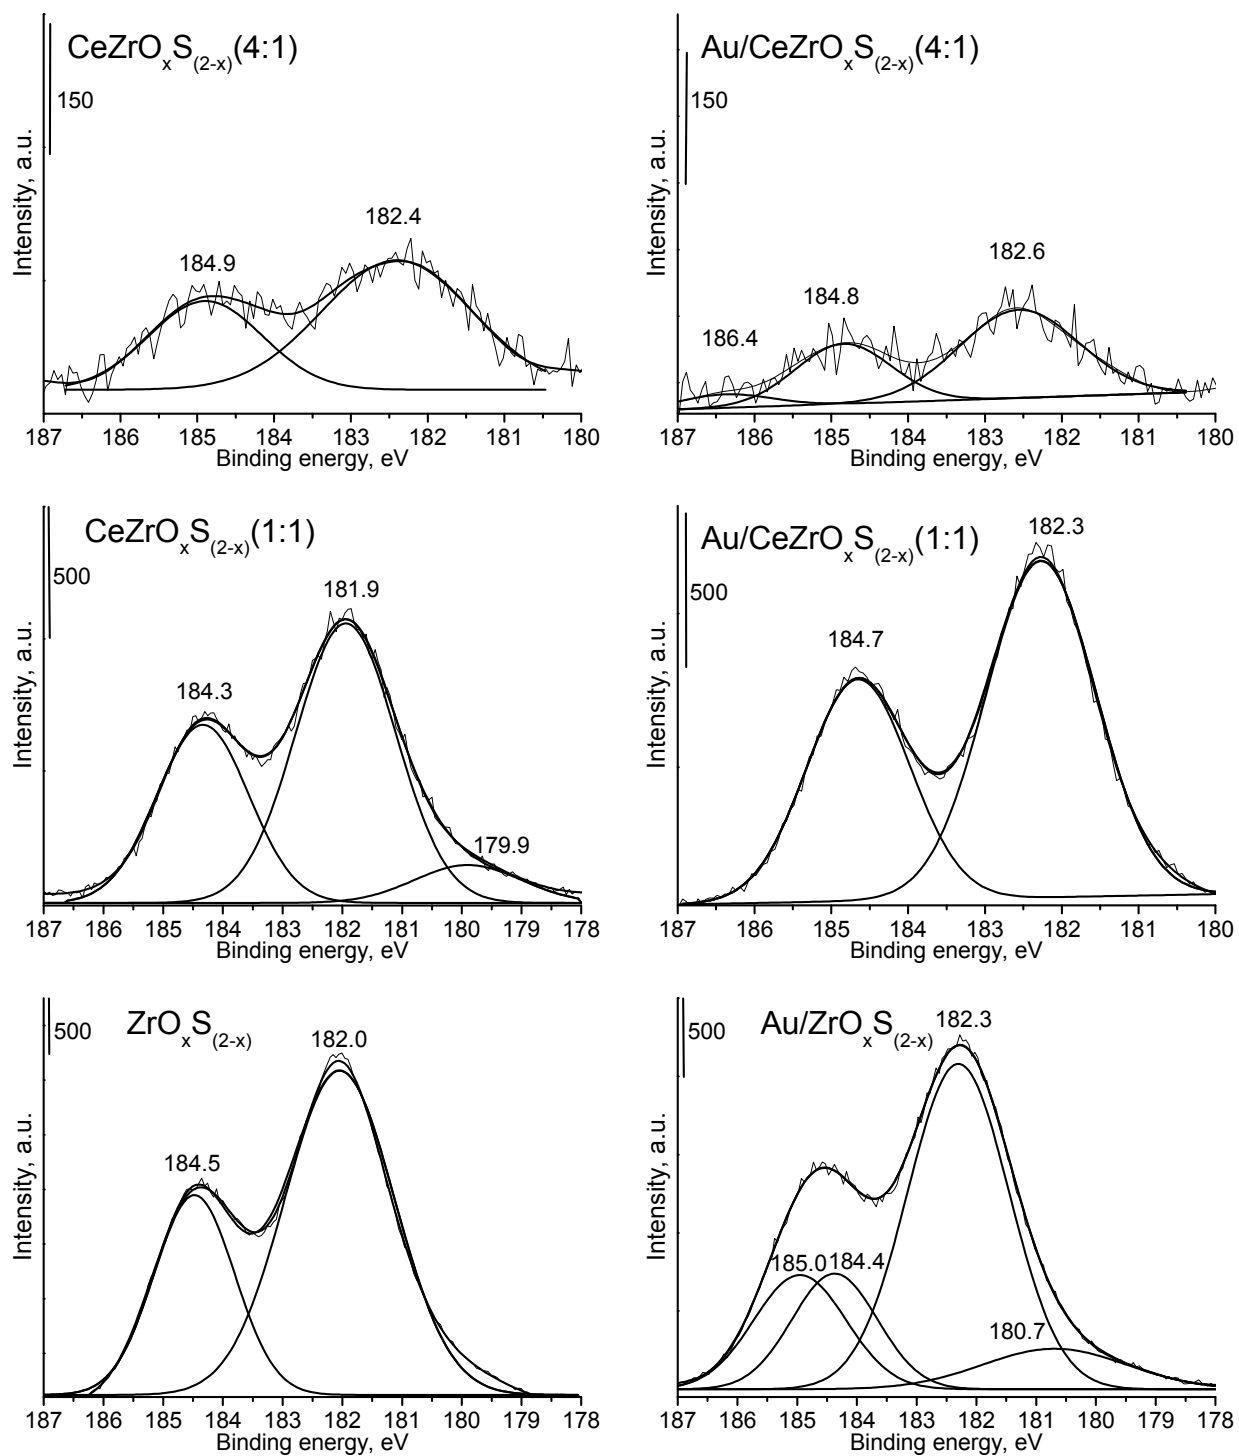

**Fig. S4.** XP spectra recorded for Zr 3d species for selected Ce-Zr oxides and zirconia with S before and after modification with Au.

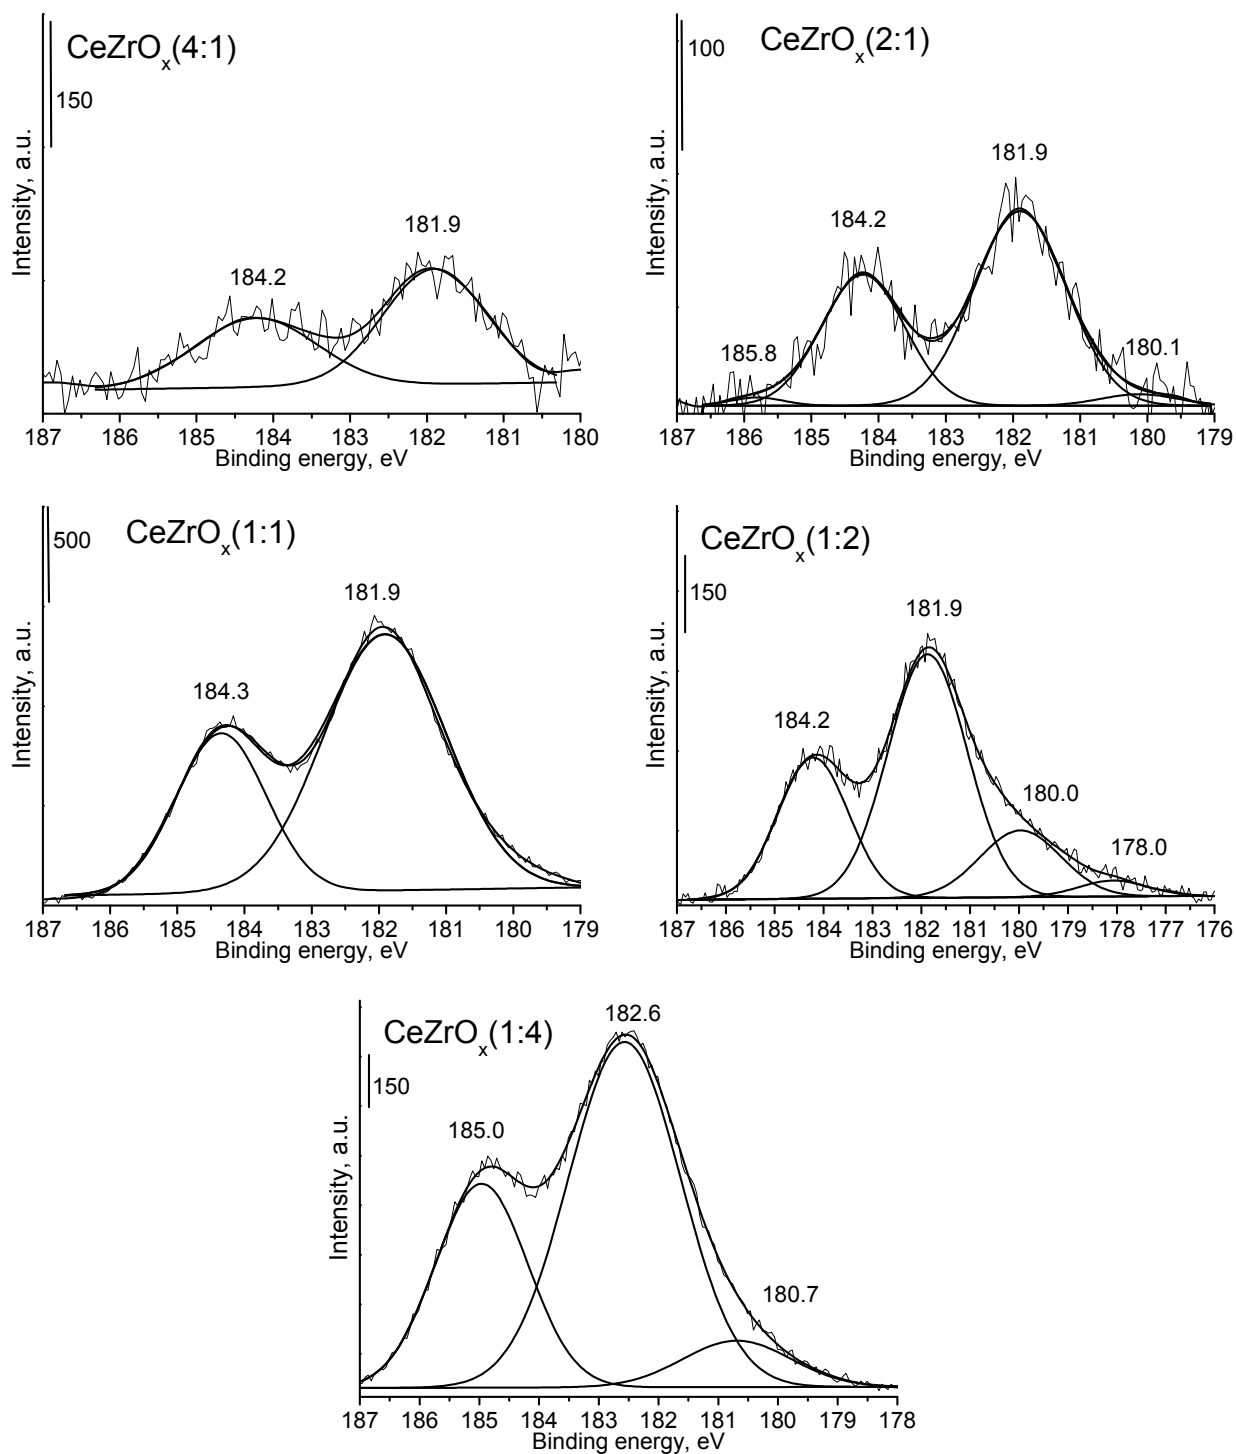

Fig. S5. XPS spectra recorded for Zr 3d species for Ce-Zr oxides.

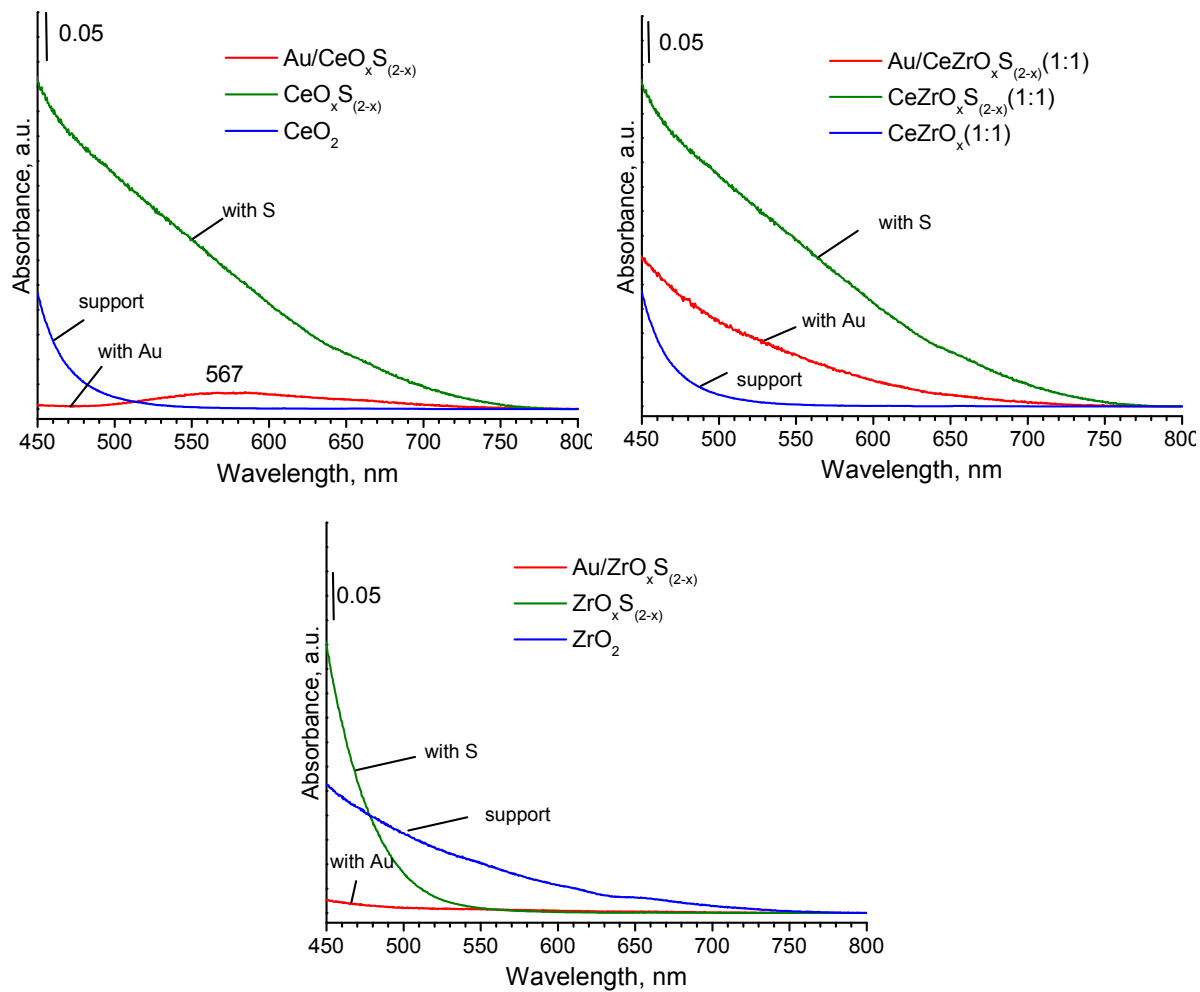

**Fig. S6.** UV-vis spectra of samples before and after their modification of H<sub>2</sub>S and after Au deposition for the spectral region of metallic gold species.

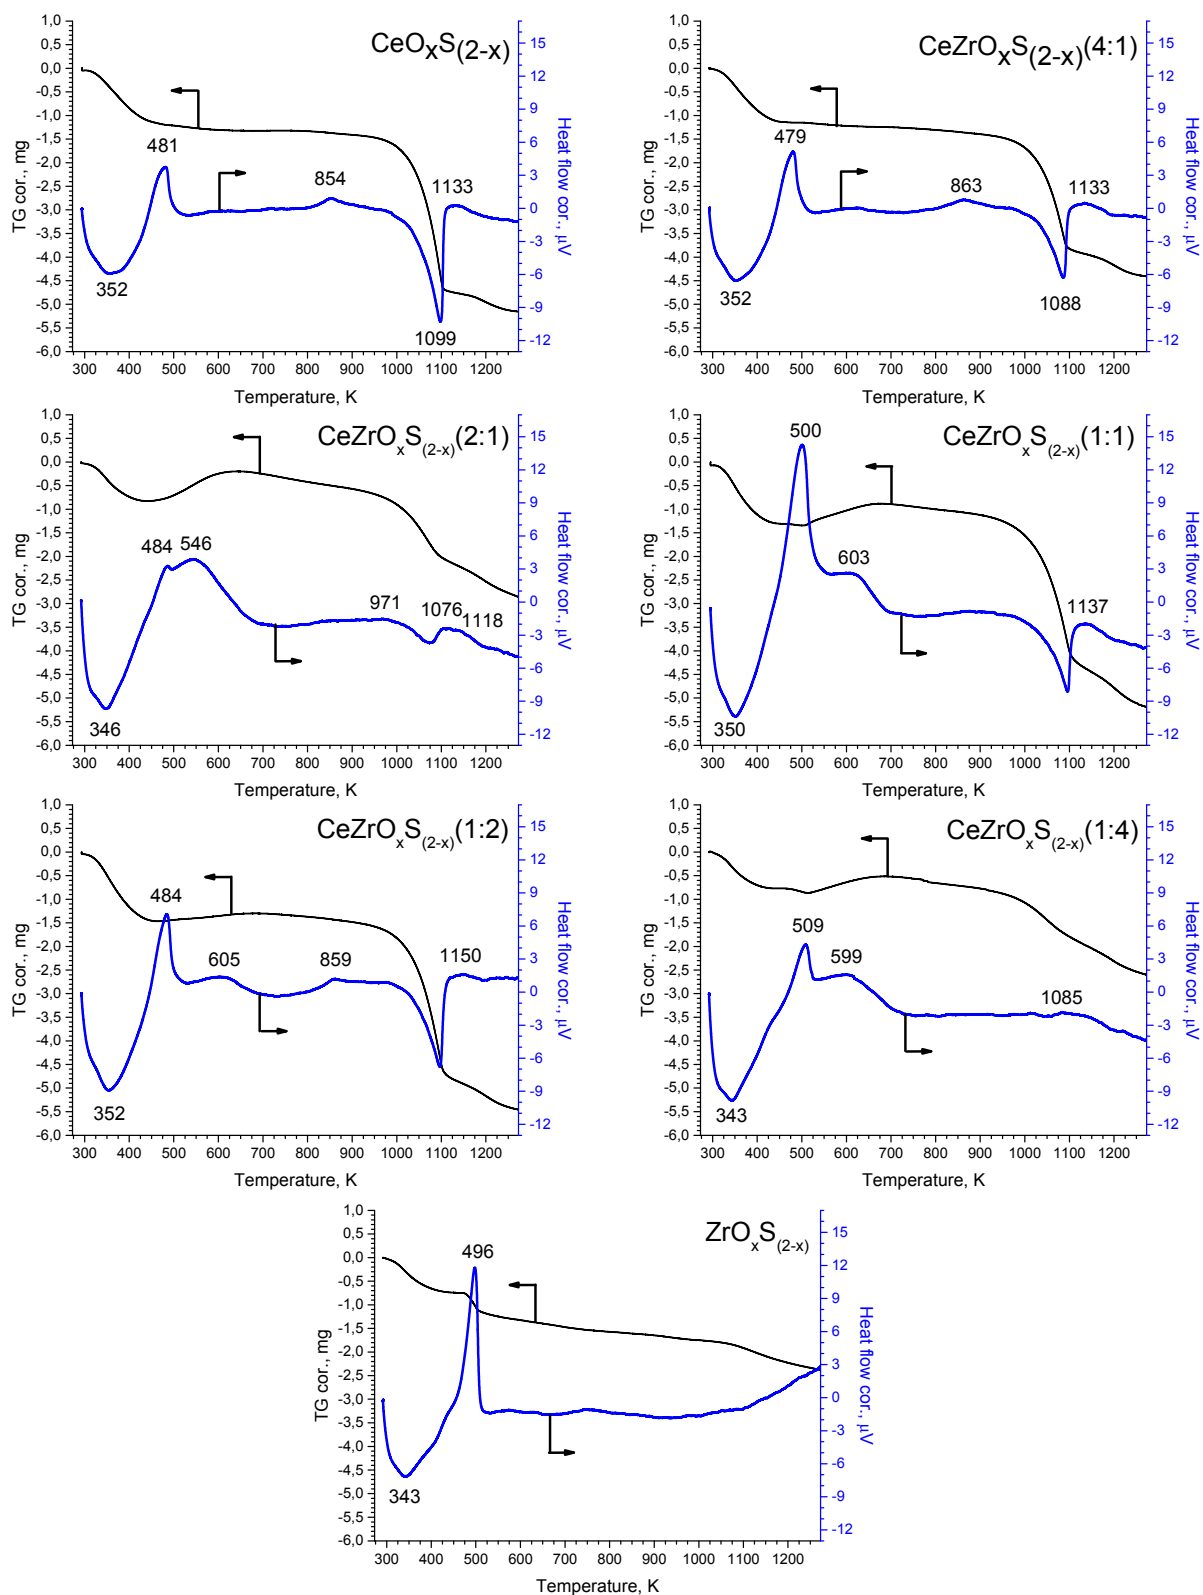

Fig. S7. TG-DTA profiles of the oxides modified with sulfur species without gold species.

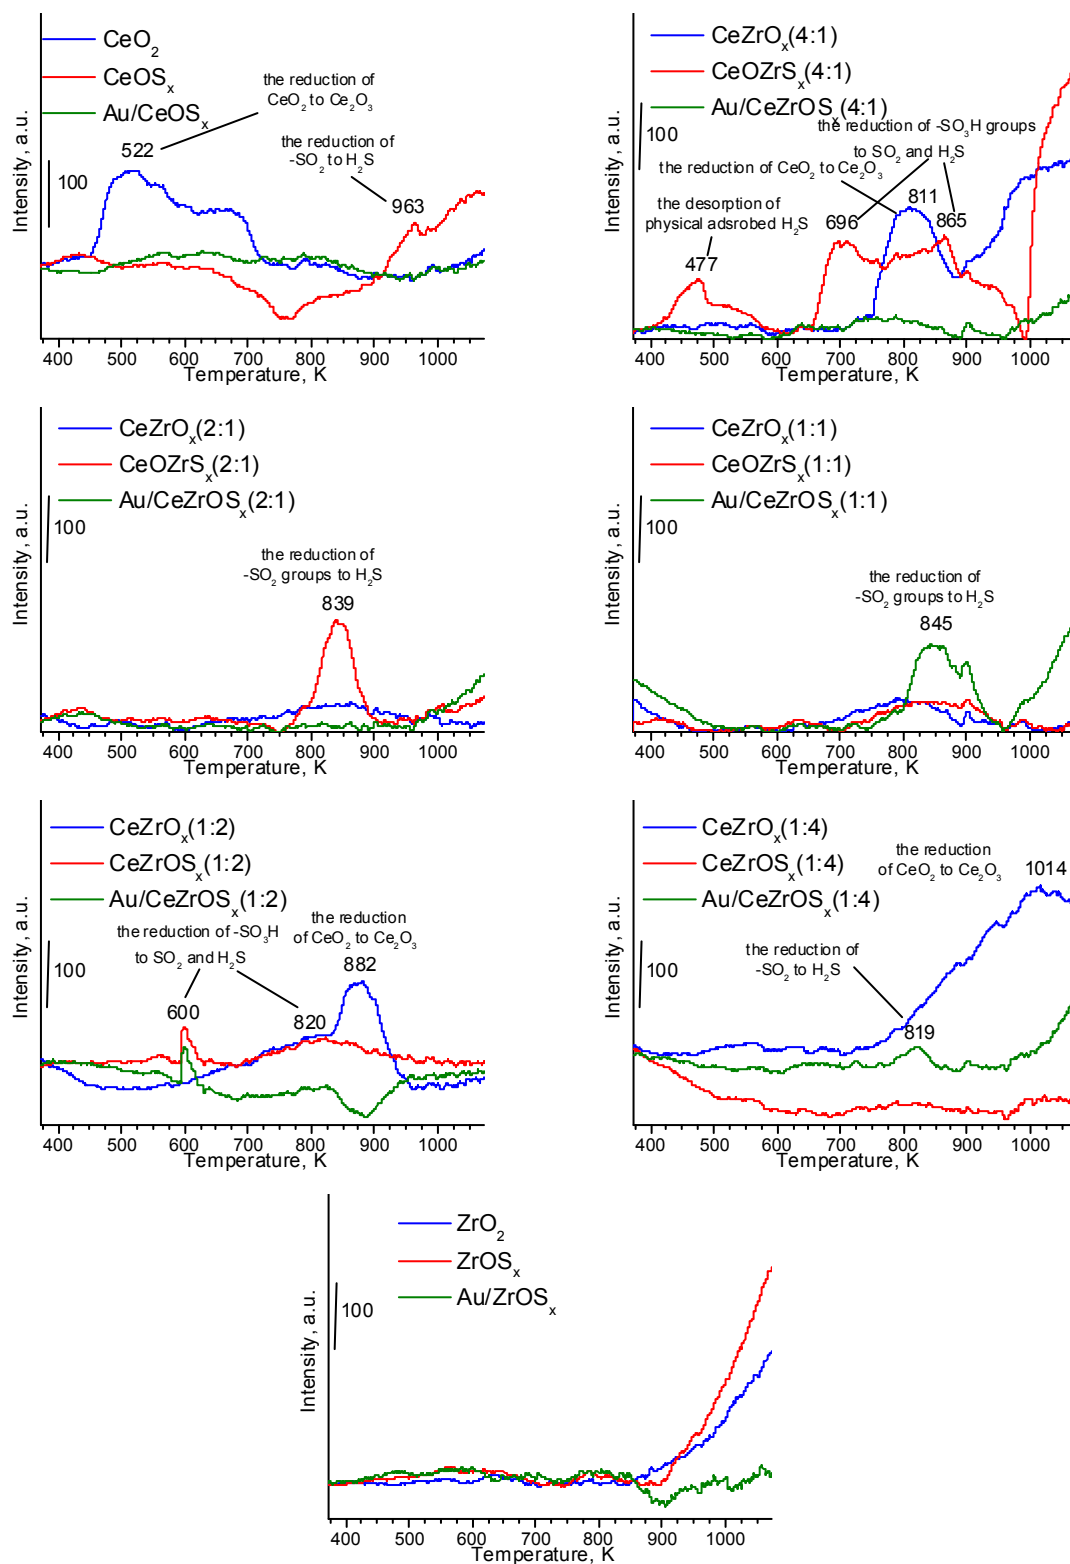

Fig. S8. The TPR H<sub>2</sub> profiles performed for the catalysts.
